# Supplementary material for: Ongoing symptoms and functional impairment 12 weeks after testing positive to SARS-CoV-2 or influenza in Australia: an observational cohort study
Source: bioRxiv or medRxiv preprint supplement (doi:10.1101/2023.04.16.23288205), 2023-04-17
Supplement: Supplementary file [file media-1.pdf]

## Supporting Information

### Queensland Health Questionnaire

|                                                                                                                                                                                                                                                            | Content displayed                                                                                                                                                                                                                                                                                          | Selection option                                                                                    | Subsequent direction / advice                                                                                 | Alignment to PCFS Grade |
|------------------------------------------------------------------------------------------------------------------------------------------------------------------------------------------------------------------------------------------------------------|------------------------------------------------------------------------------------------------------------------------------------------------------------------------------------------------------------------------------------------------------------------------------------------------------------|-----------------------------------------------------------------------------------------------------|---------------------------------------------------------------------------------------------------------------|-------------------------|
| Q1                                                                                                                                                                                                                                                         | Do you understand the participant information and wish to proceed?                                                                                                                                                                                                                                         | <input type="checkbox"/> Yes                                                                        | To Frame and Q2                                                                                               |                         |
|                                                                                                                                                                                                                                                            |                                                                                                                                                                                                                                                                                                            | <input type="checkbox"/> No                                                                         | Unfortunately we are unable to continue. If you have any questions, please call 13HEALTH (13 43 25 84) [End]  |                         |
| [Frame] When answering the questions, please think about how your life and health are <u>now</u> , compared with <u>before</u> you got the symptoms that resulted in the [COVID-19* / influenza*] test on @@Date@@. [ <i>*appropriate test displayed</i> ] |                                                                                                                                                                                                                                                                                                            |                                                                                                     |                                                                                                               |                         |
| Q2                                                                                                                                                                                                                                                         | Has your health returned to the level it was before you needed to do the test on @@Date@@?                                                                                                                                                                                                                 | <input type="checkbox"/> Yes - because I no longer have the symptoms that resulted in my test.      | To Q5                                                                                                         | PCFS Grade = 0          |
|                                                                                                                                                                                                                                                            |                                                                                                                                                                                                                                                                                                            | <input type="checkbox"/> No - because I am still experiencing ongoing symptoms.                     | To Q3                                                                                                         | See Q3                  |
|                                                                                                                                                                                                                                                            |                                                                                                                                                                                                                                                                                                            | <input type="checkbox"/> No - because I am currently unwell with unrelated symptoms or new illness. | If you are concerned about these new symptoms, please see your doctor or call 13HEALTH (13 43 25 84). (To Q5) | N/A                     |
| Q3                                                                                                                                                                                                                                                         | Have your levels of everyday activity returned to where they were before your test on @@Date@@?<br><br>For example, are you capable of working the same work hours as before the test; can you look after yourself to the same level as before the test; can you undertake the same usual activities (like | <input type="checkbox"/> Yes                                                                        | Q5                                                                                                            | PCFS Grade = 1          |
|                                                                                                                                                                                                                                                            |                                                                                                                                                                                                                                                                                                            | <input type="checkbox"/> No                                                                         | Q4                                                                                                            | See Q4                  |

|    |                                                                                                         |                                                                                                                                                                                                              |                     |          |
|----|---------------------------------------------------------------------------------------------------------|--------------------------------------------------------------------------------------------------------------------------------------------------------------------------------------------------------------|---------------------|----------|
|    | exercise/sport, duties at home) as before the test?                                                     |                                                                                                                                                                                                              |                     |          |
| Q4 | Please select one option below that best describes your current levels of health and everyday activity. | <input type="checkbox"/> Because of my ongoing symptoms, I occasionally need to reduce, spread out or avoid some usual daily activities. However, I can perform these activities without any assistance.     | Q5                  | PCFS = 2 |
|    |                                                                                                         | <input type="checkbox"/> Because of my ongoing symptoms, I can no longer perform all my usual activities. However, I can take care of myself without any assistance.                                         |                     | PCFS = 3 |
|    |                                                                                                         | <input type="checkbox"/> Because of my ongoing symptoms, I have severe restrictions on my usual activities. I now cannot take care of myself and am dependent upon another person (eg nurse, family member). |                     | PCFS = 4 |
| Q5 | Can Queensland Health contact you again to understand more about your recovery?                         | <input type="checkbox"/> Yes                                                                                                                                                                                 | Submit Button [End] |          |
